# Supplementary material for: Plaque Distribution Correlates With Morphology of Lenticulostriate Arteries in Single Subcortical Infarctions
Source: PubMed Central journal article supplement — Stroke. 2020 Aug 6;51(9):2801–9. doi: 10.1161/STROKEAHA.120.030215 (PMC7447184; doi:10.1161/strokeaha.120.030215), 2020-08-06
Supplement: str-51-2801-s001.pdf [file str-51-2801-s001.pdf]

## SUPPLEMENTAL MATERIALS

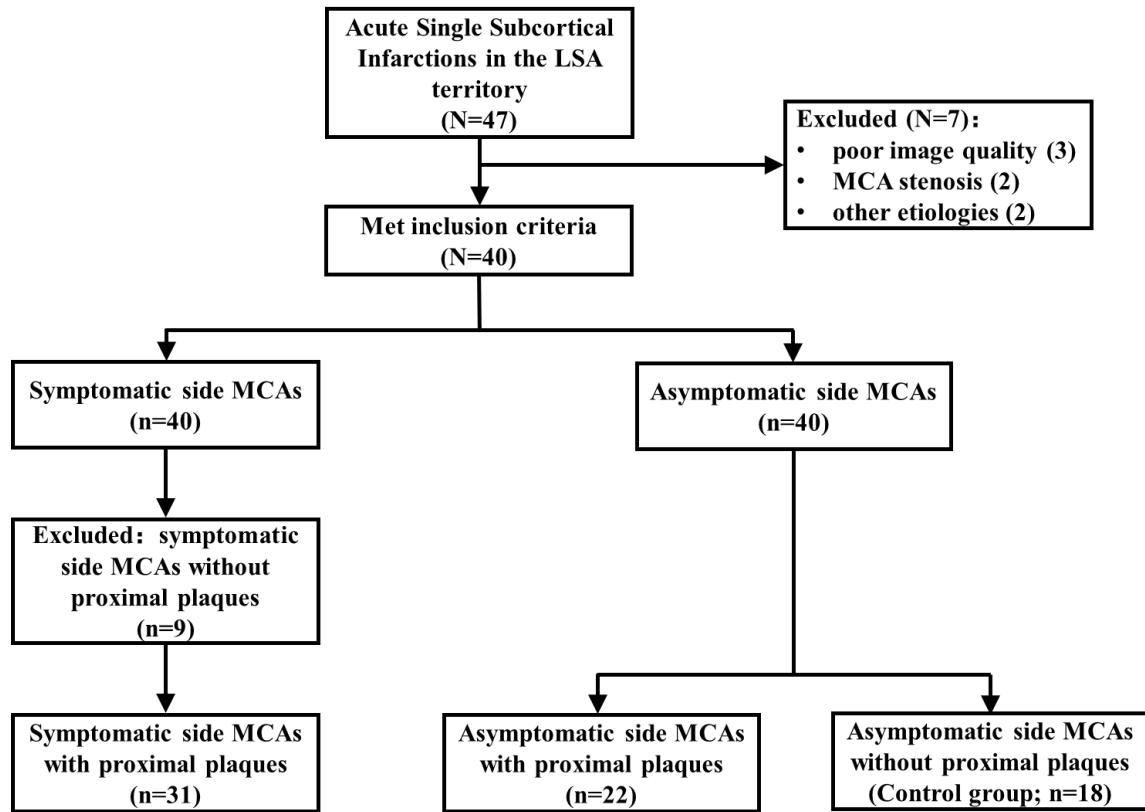

**Figure I** Flowchart of patient inclusion and grouping  
MCA, middle cerebral artery; LSA, lenticulostriate artery
